# Supplementary material
Source: Research Square preprint supplement (doi:10.21203/rs.3.rs-9122936/v1)
Supplement: Supplementary file 1 [file 0809a8679f1b7c618c1f66cf.docx]

| **Case** | **Primary tumor** | **Age** | **Sex** | **ECOG** | **Interval primary→Pit met (mo)** | **Visual defect** | **Hypopituitarism** | **AVP-D** | **intracranial mets** | **Other systemic mets** | **Tx systemic** | **Tx radiotherapy** | **Surgery/biopsy** | **Survival after Pit met dx (mo)** | **Outcome** |
| --- | --- | --- | --- | --- | --- | --- | --- | --- | --- | --- | --- | --- | --- | --- | --- |
| 1 | Skull base squamous cell carcinoma | 53 | M | 3 | 11 | Yes | No | No | Yes | Yes | Yes | Yes | No | 3 | Deceased |
| 2 | Adenoid cystic carcinoma | 80 | F | 1 | 0 | Yes | Yes | No | Yes | Yes | No | Yes | Yes | 9 | Deceased |
| 3 | Parotid gland | 44 | M | 1 | 1 | Yes | Yes | Yes | No | Yes | Yes | Yes | Yes | 10 | Deceased |
| 4 | Small cell lung cancer | 66 | F | 2 | 0 | Yes | Yes | No | No | No | No | No | No | 3 | Deceased |
| 5 | Melanoma | 28 | F | 0 | 25 | No | No | No | Yes | Yes | No | Yes | No | 7 | Deceased |
| 6 | Unknown | 60 | F | 3 | 0 | No | No | No | Yes | Yes | No | No | No | 3 | Deceased |
| 7 | Breast cancer HER2 + | 51 | F | 3 | 50 | No | No | Yes | Yes | Yes | Yes | Yes | No | 1 | Deceased |
| 8 | Breast - HER2 - | 34 | F | 1 | 42 | No | Yes | Yes | Yes | Yes | Yes | No | No | 0 | Deceased |
| 9 | Breast - triple negative | 60 | F | 1 | 48 | No | Yes | No | No | Yes | Yes | Yes | Yes | 20 | Deceased |
| 10 | Breast cancer HER2 + | 40 | F | 2 | 23 | Yes | Yes | Yes | Yes | Yes | No | Yes | Yes | 7 | Deceased |
| 11 | Germ Cell Tumor | 27 | M | 1 | 0 | No | Yes | Yes | No | Yes | Yes | No | No | 13 | Deceased |
| 12 | Unknown | 52 | F | 0 | 0 | Yes | No | Yes | No | No | No | No | Yes | 6 | Deceased |
| 13 | Lung | 65 | F | 2 | 2 | No | Yes | No | No | Yes | Yes | Yes | No | 9 | Alive |
| 14 | Linfoma | 82 | M | 3 | 54 | Yes | Yes | Yes | No | Yes | Yes | No | No | 0 | Deceased |
