# Supplementary material
Source: Research Square preprint supplement (doi:10.21203/rs.3.rs-9122936/v1)
Supplement: Supplementary file 2 [file 3edc7362fc7295f8559c7448.docx]

Table 2. Demographic characteristics, clinical presentation, and outcomes of patients with pituitary metastasis stratified by the presence of arginine vasopressin deficiency (AVP-D).

|  | AVP-D | No AVP-D |
| --- | --- | --- |
| **n** | 7 | 7 |
| **Age, median (IQR)** | 44.0 (37.0–51.5) | 60.0 (56.5–65.5) |
| **Female, n (%)** | 4 (57.1) | 6 (85.7) |
| **Visual defect, n (%)** | 4 (57.1) | 3 (42.9) |
| **Hypopituitarism, n (%)** | 5 (71.4) | 4 (57.1) |
| **Systemic therapy, n (%)** | 5 (71.4) | 3 (42.9) |
| **Radiotherapy, n (%)** | 3 (42.9) | 5 (71.4) |
| **Surgery/biopsy, n (%)** | 3 (42.9) | 2 (28.6) |
| **Primary→Pit met, median (IQR) mo** | 23.0 (0.5–46.0) | 2.0 (0.0–18.0) |
| **OS after Pit met, median (IQR) mo** | 6.0 (0.5–8.5) | 7.0 (3.0–9.0) |
| **Deaths, n (%)** | 6 (85.7) | 6 (85.7) |
